# Supplementary material for: Interactions between rat alveolar epithelial cells and bone marrow-derived mesenchymal stem cells: an in vitro co-culture model
Source: PubMed Central journal article supplement (PMC4480799; doi:10.1186/s40635-015-0053-2), 2015-05-24
Supplement: 40635_2015_53_MOESM1_ESM.pdf [file 40635_2015_53_MOESM1_ESM.pdf]

(A)

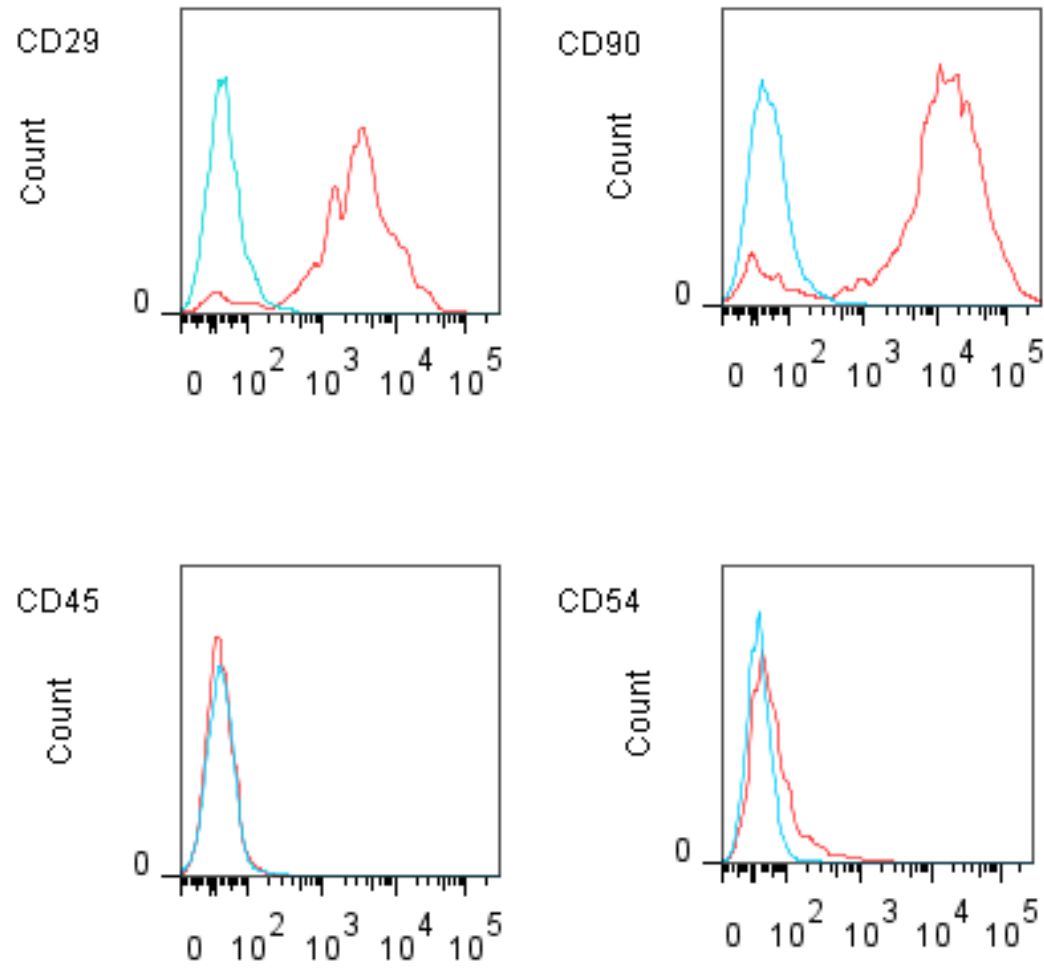

— Isotype Control  
— Antibody

(B)

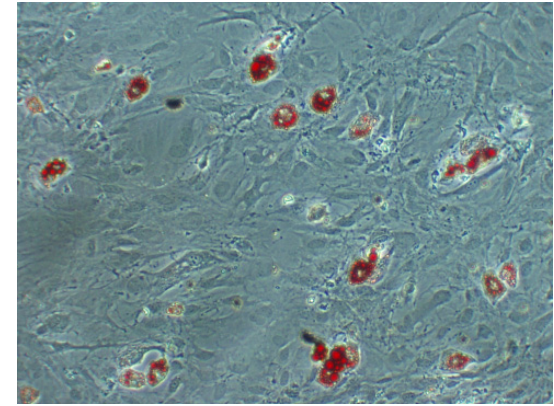

Adipogenesis

(C)

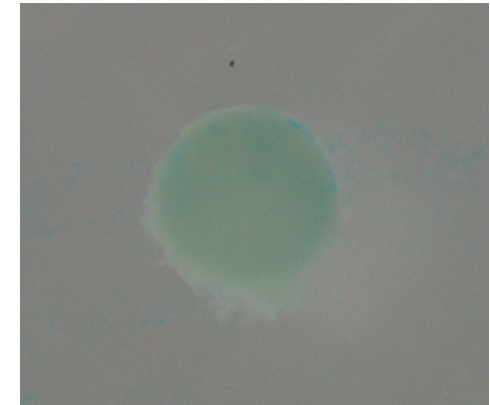

Chondrogenesis

(D)

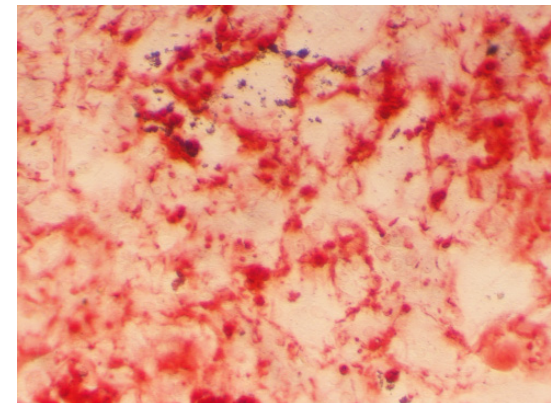

Osteogenesis
